# Supplementary material for: E47 modulates hepatic glucocorticoid action
Source: Springer Nature journal article supplement (doi:10.1038/s41467-018-08196-5), 2019-01-14
Supplement: MOESM1 [file 41467_2018_8196_MOESM1_ESM.pdf › 41467_2018_8196_MOESM1_ESM.pdf]

## **Supplementary Figures and Tables**

**Hemmer et al.**

*E47 mediates hepatic glucocorticoid action*

**Supplementary Figure 1: E2A expression and genomic binding in mouse liver.**

**A**

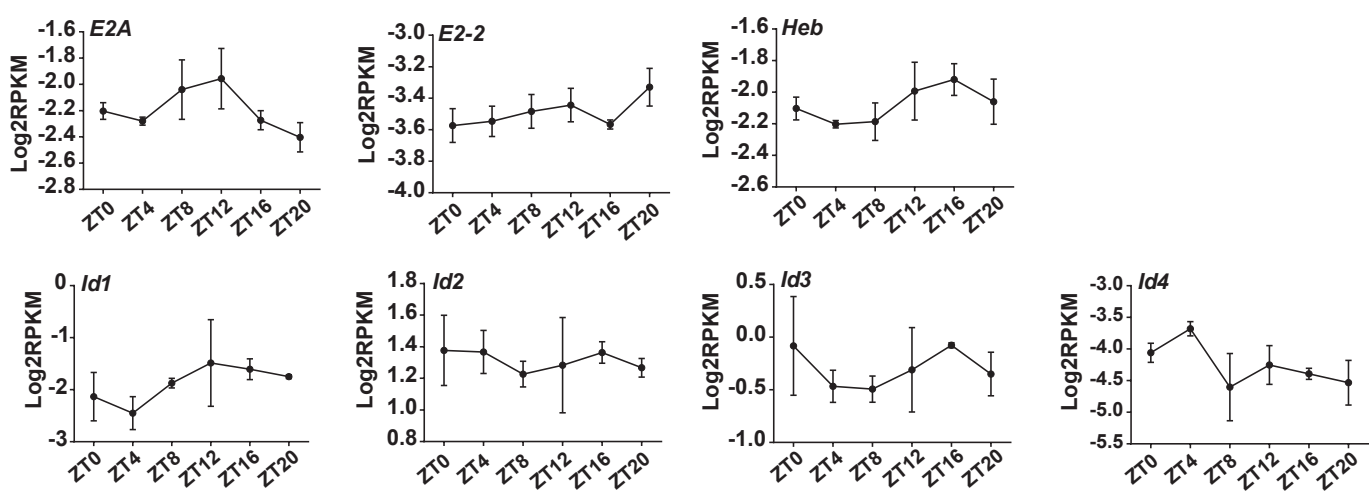

**B**

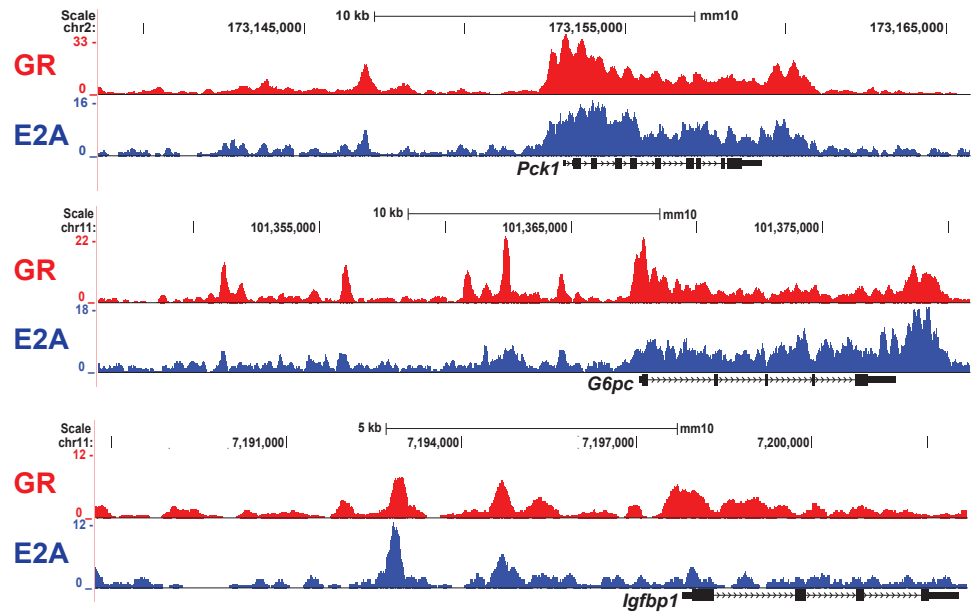

**C**

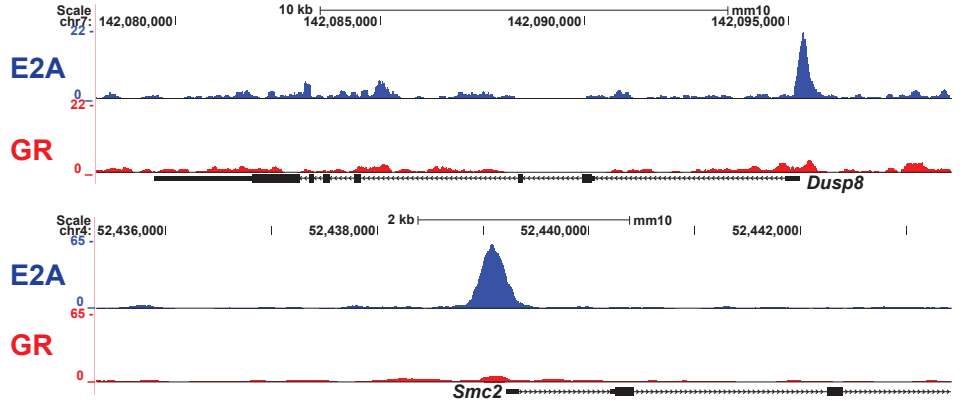

**D**

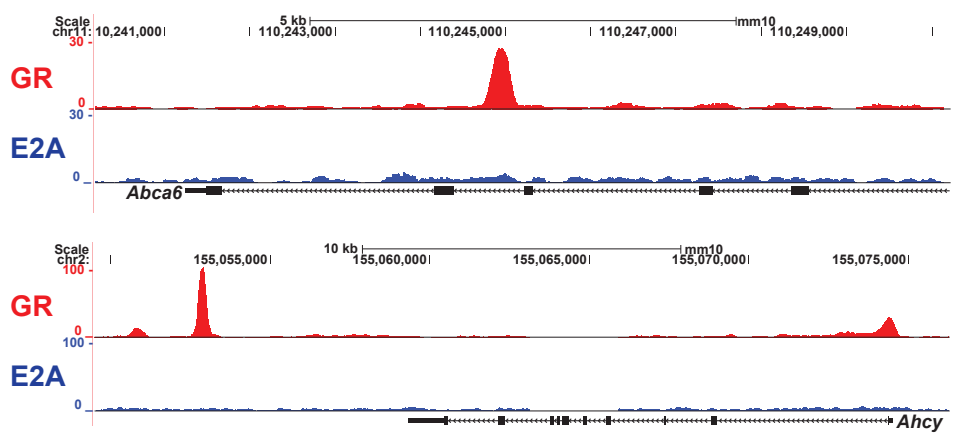

**A:** RNA-Seq data from WT livers at 6 time-points around the clock (ZT0= 7am; ZT12= 7pm). Expression of E-Box proteins (E2A, E2-2, Heb) and ID-Proteins (Id1, Id2, Id3, Id4) is displayed as mean Log<sub>2</sub>RPKM ±SEM, n= 4. **B:** Representative ChIP-Seq tracks displaying co-occupancy of GR and E2A at metabolic promoters and enhancers in WT livers (red= GR; blue=E2A) **C:** Representative ChIP-Seq tracks showing E2A-specific occupancy at hepatic promoters/enhancers, and functional annotation of E2A-specific target genes by gene ontology (GO) analysis, assigning ChIP peaks to the nearest coding gene. **D:** Analogous representation of GR-specific occupancy and functional annotation of GR-specific targets by GO analysis (red= GR; blue=E2A).

| GO: Biological process                | FDR Q-value |
|---------------------------------------|-------------|
| Cellular amino acid metabolic process | 1.14e-2     |
| Carboxylic acid catabolic process     | 2.23e-2     |
| Inactivation of MAPK activity         | 2.14e-2     |

**Examples:**  
*Got1, Idh1, Acad11, Dusp8, Smc2*

| GO: Biological process                  | FDR Q-value |
|-----------------------------------------|-------------|
| Small molecule metabolic process        | 1.52e-42    |
| Carboxylic acid metabolic process       | 9.43e-37    |
| Lipid metabolic process                 | 6.99e-28    |
| Fatty acid metabolic process            | 5.94e-20    |
| Cellular carbohydrate metabolic process | 9.28e-12    |

**Examples:**  
*Abca6, Acot11, Elovl5, Dgat2, Cpt1a*

# Supplementary Figure 2: Phenotypic characteristics and gene expression data from *E47*<sup>-/-</sup> mice.

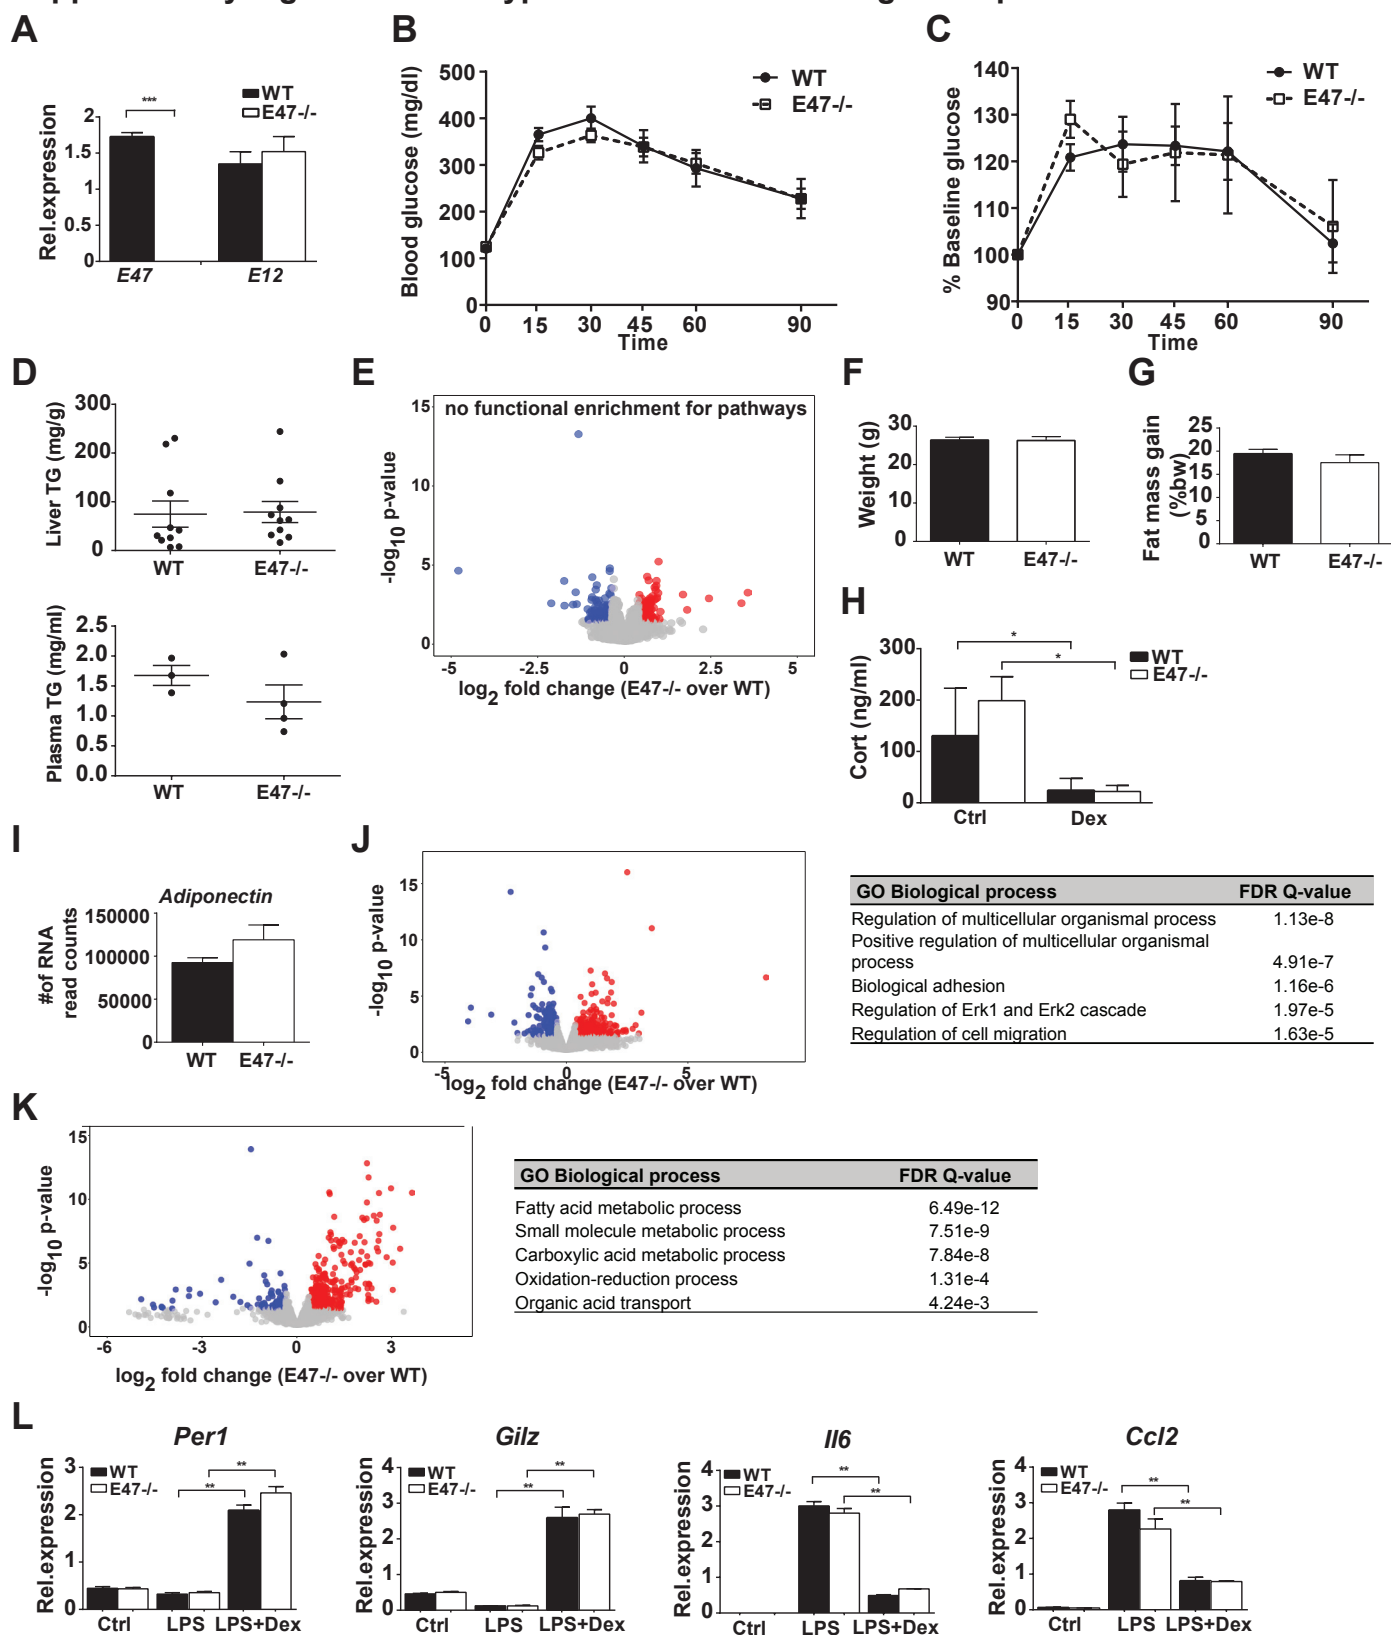

**A:** qRT-PCR of *E47* and *E12* expression in mouse livers after Dex treatment, normalized to *U36b4*. Data are expressed as mean  $\pm$  SEM, (\*\*\*)  $P < 0.0001$ , Student's *t*-test,  $n = 10$  (WT) & 7 (*E47*<sup>-/-</sup>). **B:** i.p. GTT and **C:** i.p. PTT in untreated *E47*<sup>-/-</sup> and WT mice. Data were analyzed by ANOVA and Bonferroni's multiple comparison test and are shown as mean  $\pm$  SEM,  $n = 9$  (WT) & 15 (*E47*<sup>-/-</sup>) for GTT;  $n = 6$  (WT) & 7 (*E47*<sup>-/-</sup>) for PTT. **D:** Liver and plasma triglycerides in untreated mice. Data are mean  $\pm$  SEM,  $n = 10$  per genotype (liver);  $n = 3$  (WT) & 4 (*E47*<sup>-/-</sup>) (plasma). **E:** Volcano plot and GO analysis of differentially expressed genes (blue= down-; red=up-regulated) in untreated mouse livers (FC 1.3,  $P < 0.05$ ,  $n = 5$  (WT) & 6 (*E47*<sup>-/-</sup>)). For GO analysis a base mean cutoff  $> 200$  was used. **F:** Body weight of untreated *E47*<sup>-/-</sup> and WT mice. Data are mean  $\pm$  SEM,  $n = 7$  (WT) & 9 (*E47*<sup>-/-</sup>). **G:** Fat mass gain as percentage of body weight after Cort treatment. Data are mean  $\pm$  SEM,  $n = 8$  (WT) & 11 (*E47*<sup>-/-</sup>). **H:** Plasma corticosterone of mice 6hrs after injection of 1mg/kg Dex or vehicle. Data are mean  $\pm$  SEM, UT:  $n = 7$  per genotype; Dex-injected:  $n = 6$  (WT) & 5 (*E47*<sup>-/-</sup>). **I:** Average number of normalized NGS read counts for *Adipoq* in Dex-treated white adipose tissue. Data are mean  $\pm$  STDEV,  $n = 2$  per genotype. **J:** Volcano plot and GO analysis of differentially expressed genes (blue= down-; red=up-regulated) in white adipose tissue (WAT) and skeletal muscle (SM) of *E47*<sup>-/-</sup> mice on Dex (FC 1.3,  $P < 0.05$ ); For GO analysis a base mean cutoff  $> 200$  was used; SM:  $n = 2$  (WT) & 3 (*E47*<sup>-/-</sup>); WAT:  $n = 2$  per genotype. **L:** qRT-PCR in macrophages isolated from *E47*<sup>-/-</sup> and WT mice and treated with LPS or LPS+Dex, normalized to *U36b4*; data are mean  $\pm$  STDEV (\*\*  $P < 0.01$ , (\*\*\*)  $P < 0.001$ , Student's *t*-test,  $n = 2$  per genotype.

**Supplementary Figure 3: Measurements in *E47* liver specific mutant mice.**

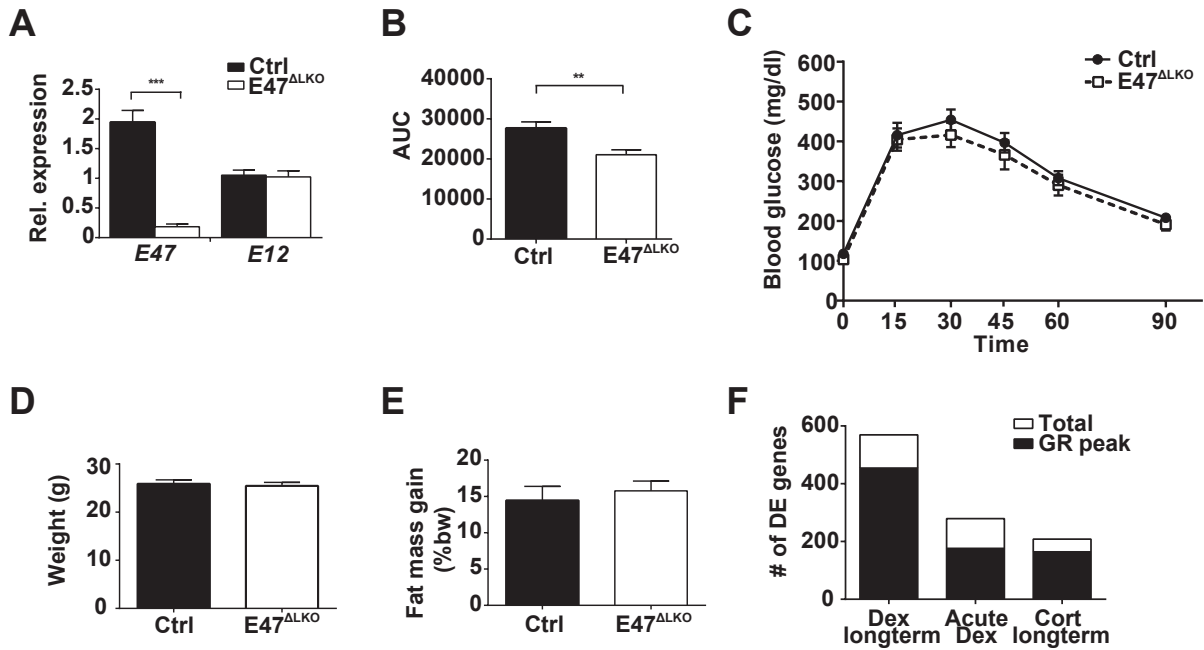

**A:** qRT-PCR of E47 and E12 expression in livers after Dex treatment, normalized to U36b4. Data are mean ± SEM, (\*\*\*)  $P < 0.0001$ , Student's t-test,  $n = 7$  (Ctrl) &  $5$  ( $E47^{\Delta LKO}$ ). **B:** Area under the curve (AUC) of GTT (Fig. 3A). Student's t-test was performed on AUC, (\*\*)  $P < 0.01$ . **C:** i.p. GTT in untreated  $E47^{\Delta LKO}$  and control mice. Data were analyzed by ANOVA and Bonferroni's multiple comparison test and are mean ± SEM,  $n = 10$  (WT) &  $11$  ( $E47^{\Delta LKO}$ ). **D:** Body weight of untreated  $E47^{\Delta LKO}$  and control mice. Data are mean ± SEM,  $n = 7$  per genotype. **E:** Fat mass gain as percentage of body weight on Cort. Data are mean ± SEM,  $n = 8$  per genotype. **F:** Number of genes differentially expressed in *E47* mutant mice with a nearby GR ChIP peak (see Fig. 3G).

## Supplementary Figure 4: Expression levels and binding in mutant mice.

**A**

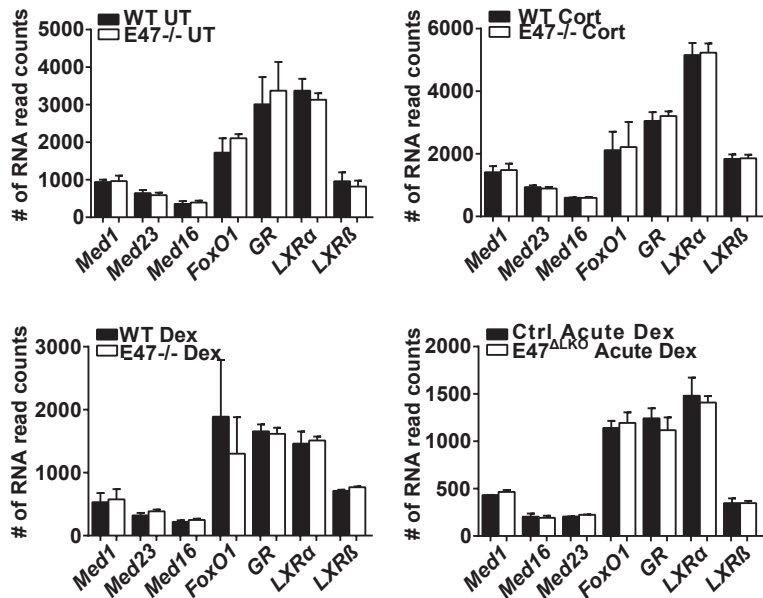

**B**

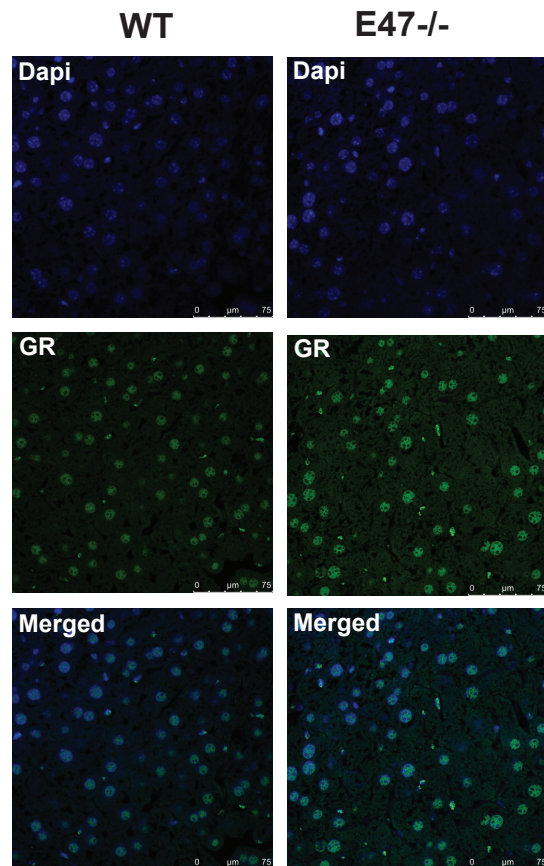

**C**

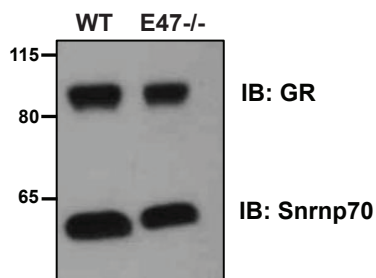

**D**

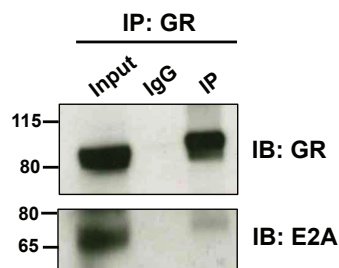

**E**

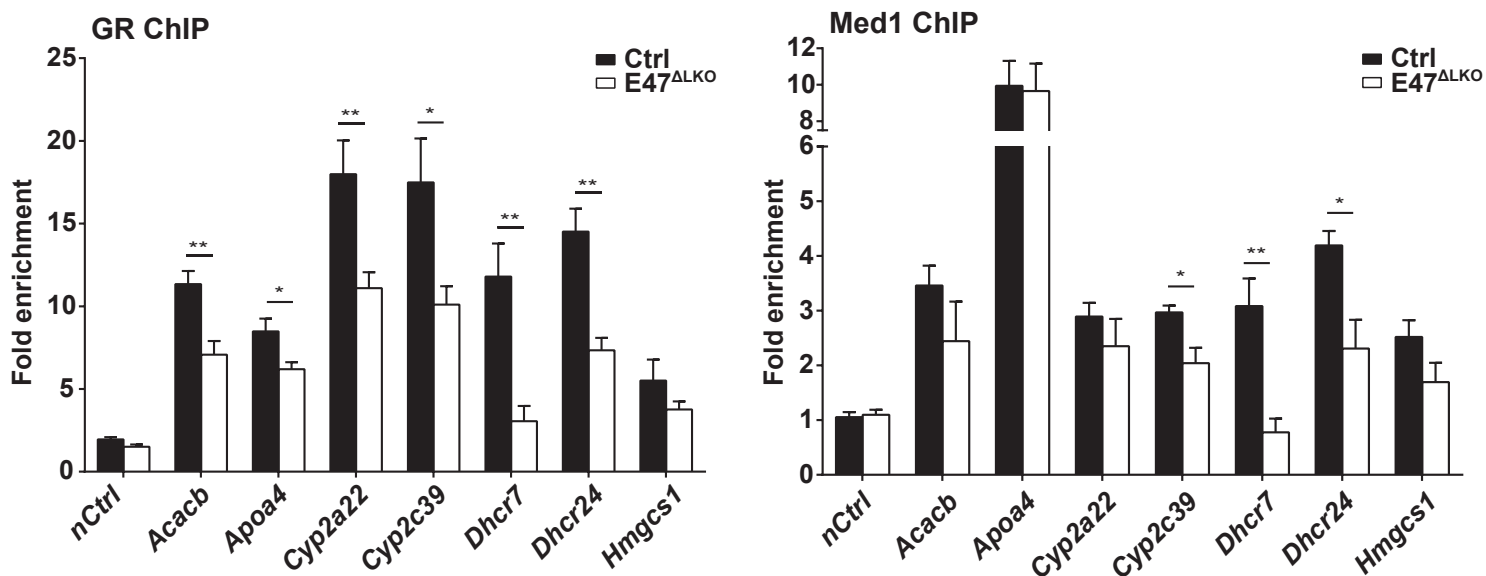

**A:** Number of normalized read counts for Med1, Med23, Med16, Foxo1, GR, Lxrα and Lxrβ from RNA-Seq data in livers either untreated (UT), Cort or Dex treated or Dex-injected (Fig. 2&3 and Suppl. Fig. 2). Data are mean ±STDEV. **B:** Immunostaining for GR in Dex-injected E47<sup>-/-</sup> and WT livers co-stained with DAPI, 63x magnification (75μm), confocal microscopy. **C:** Western blot of nuclear extracts from Dex-treated WT and E47<sup>-/-</sup> livers. Immunoblot (IB) for GR and Snrnp70. **D:** Co-IP of GR and E2A in Dex-treated WT livers. Immunoblot (IB) for 30% input and IP against GR. **E:** ChIP-qPCR in Cort-treated E47<sup>ΔLKO</sup> and control livers shows binding of GR & Med1 at metabolic promoters/enhancers. Data are shown as fold enrichment over IgG (n= 4 (Ctrl) and 6 (E47<sup>ΔLKO</sup>)). Data are mean ±SEM, (\*) P<0.05, (\*\*) P<0.01, Student's t test.

Supplementary Figure 5: Data from fasted *E47* mutants.

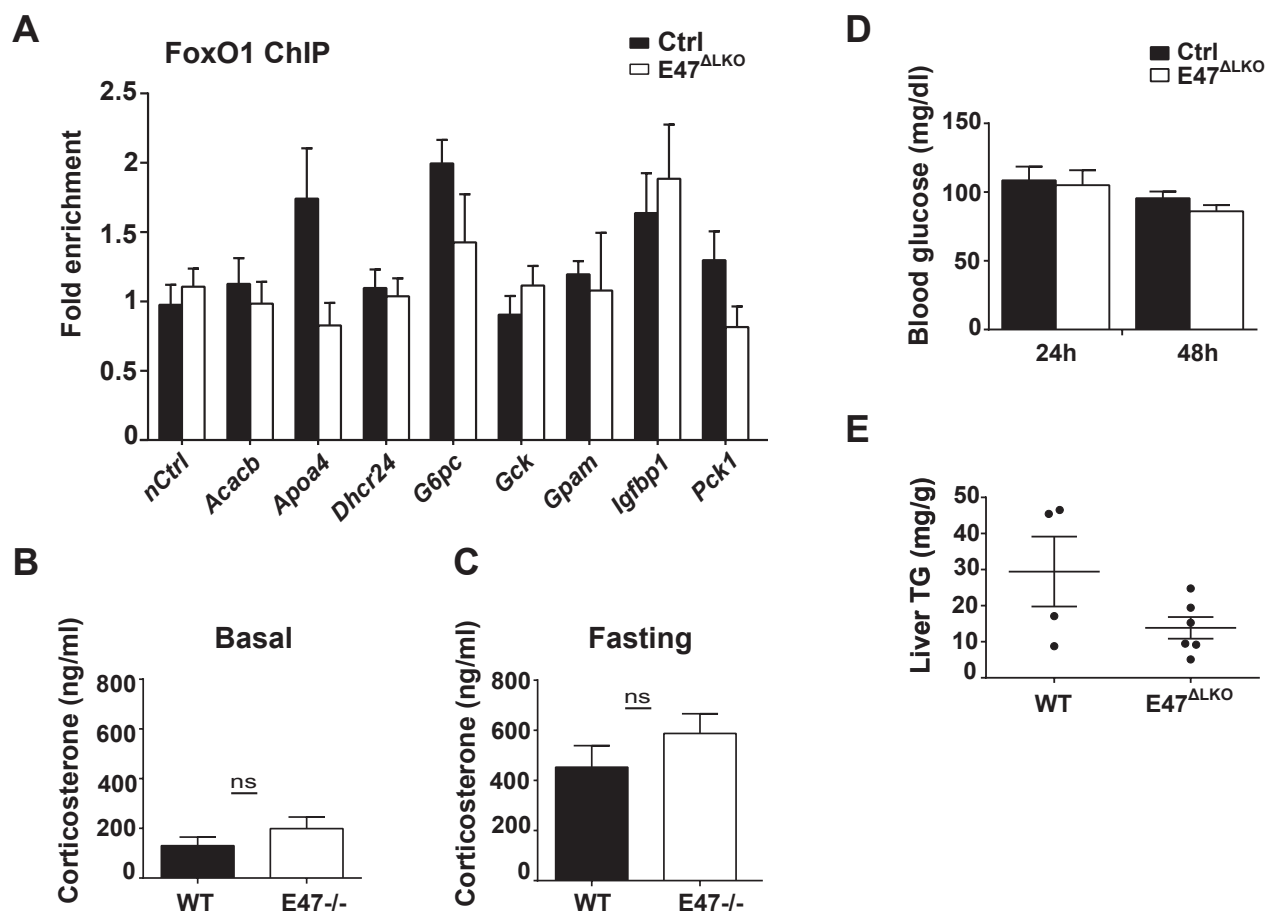

**A:** ChIP-qPCR in fasted *E47*<sup>ΔLKO</sup> and control livers shows binding of Foxo1 at metabolic promoters/enhancers. Data are shown as fold enrichment over IgG, n= 6 (Ctrl) and 4 (*E47*<sup>ΔLKO</sup>). Data are mean ± SEM. **B:** Plasma corticosterone levels of untreated *E47*<sup>-/-</sup> mice and wildtype littermates, n=7 per genotype (Data taken from Supplementary Figure 2H). **C:** Plasma corticosterone levels of 48h-fasted *E47*<sup>-/-</sup> mice and wildtype littermates, n=8 (WT) & 5 (*E47*<sup>-/-</sup>). **D:** Blood glucose levels of *E47*<sup>ΔLKO</sup> mice and control littermates measured at 24hrs and 48hrs of fasting. Data are mean ± SEM, n=4 (Ctrl) & 5-6 (*E47*<sup>ΔLKO</sup>). **E:** Liver triglycerides in 48h-fasted *E47*<sup>-/-</sup> mice and wildtype littermates. Data are mean ± SEM, n= 4 (Ctrl) & 6 (*E47*<sup>ΔLKO</sup>).

**Supplementary Table 1a: Primers for ChIP qPCR**

| <b>Abbreviation</b> | <b>Forward primer (5'-3')</b> | <b>Reverse primer (3'-5')</b> |
|---------------------|-------------------------------|-------------------------------|
| <b>Acacb</b>        | CAGGCAGCGAGCATTTCCTA          | TCTGATGCCCTTGTGCCTAC          |
| <b>Apoa4</b>        | TCACTGGGGTGGAAAGAGGA          | CCTGAACAGAACTGAGGCC           |
| <b>Cyp2a22</b>      | AAGGCCATCATGTACCTGGC          | TGGCATGGATCTACAAAGGCT         |
| <b>Cyp2c39</b>      | GGGTTACTCAACGATGCTCAA         | TTGTGATCAGGCATCACTGGC         |
| <b>Dhcr7</b>        | CCTGCGTAGCTTGGTTTCCTA         | CAGAAGCTGGGCTATGACGG          |
| <b>Dhcr24</b>       | CTGGATGCCCTGTGAGTTCTA         | ACAGGCATTTCGAAACATACT         |
| <b>G6pc</b>         | CAGGACGAAGGGAGAGAGC           | AGTTCAGGCTGAGGACCTTG          |
| <b>Gck</b>          | GCTGTGGGTGAGGACTGTCT          | TTTAGGAGCCACCTCTCAGACT        |
| <b>Gpam</b>         | ACACACAAGGAGGAGTGACG          | CACGGTTGCCCAATGAGTTA          |
| <b>Hmgcr</b>        | GGCCGCCAATAAGGAAGGAT          | GGAGACCGTTCGTGACGTAG          |
| <b>Hmgcs1</b>       | TGGTCGGAGAACCTCTCACT          | CGAGAACAAGCCTGCCAATG          |
| <b>Igfbp1</b>       | CAGCACTTCCACCGTTGAC           | GCAGCTCCAGAGTTAGGCAA          |
| <b>Pck1</b>         | CAGGGCTGTCCTCCCTTCTA          | CTGTTGACCGAGGGTGTGTT          |
| <b>nCtrl</b>        | GCTGGCAGAATAGCATCCG           | TGATGAAGCACTCGTTGAGGC         |

**Supplementary Table 1b: Primers for mRNA**

| <b>Abbreviation</b> | <b>Forward primer (5'-3')</b> | <b>Reverse primer (3'-5')</b> |
|---------------------|-------------------------------|-------------------------------|
| <b>Acacb</b>        | CCTTTGGCAACAAGCAAGGTA         | AGTCGTACACATAGGTGGTCC         |
| <b>Apoa4</b>        | CGTGGACCTGCAAGATCAGA          | TCTGCATGCGCTGGATGTAT          |
| <b>Ccl2</b>         | TTAAAAACCTGGATCGGAACCAA       | GCATTAGCTTCAGATTTACGGGT       |
| <b>Cyp2a22</b>      | GTCACTCGCCTCTGCAAAAC          | TGTACTACTGGGCTTGGGAAC         |
| <b>Cyp2c39</b>      | GAGGAAGCATTCCAATGGTAGAA       | TGTGAAGCGCCTAATCTCTTTT        |
| <b>Dhcr7</b>        | AGCTTCAGGCAGGCACTTAG          | TGCTGGGATTTTGAAGCCAT          |
| <b>Dhcr24</b>       | CTGAAGACAAACCGGGAGGG          | AAGATGGGGTTGTTGCCGAA          |
| <b>E12</b>          | TGCAGGATGAGCAGTTTGGT          | GAGGCCTTTAAGGAGCTCGG          |
| <b>E47</b>          | TTATCCGACTTGAGGTGCAG          | CTGGAGGAGAAGGACCTGAG          |
| <b>Gck</b>          | AACGACCCCTGCTTATCCTC          | CTTCTGCATCCGGCTCATCA          |
| <b>Gpam</b>         | CTTCTAAGTCACCCACACCTGG        | TTGCTTACTGGTCTGTATCCT         |
| <b>Gilz</b>         | ACCACCTGATGTACGCTGTG          | TCTGCTCCTTTAGGACCTCCA         |
| <b>G6pc</b>         | CGACTCGCTATCTCCAAGTG          | GTTGAACCAGTCTCCGACC           |
| <b>Hmgcr</b>        | AGCTTGCCCGAATTGTATGTG         | TCTGTTGTGAACCATGTGACTTC       |
| <b>Hmgcs1</b>       | GATCCCTTTGGTGGCTGAAG          | GAAAGAGCTGTGTGAAGGACAG        |
| <b>Il6</b>          | TAGTCCTTCCACCCCAATTTCC        | TTGGTCCTTAGCCACTCCTTC         |
| <b>Igfbp1</b>       | TCGTGACCACTGAGCAACTG          | AGTTAGGAACTCGGGCATCG          |
| <b>Pck1</b>         | CTGCATAACGGTCTGGACTTC         | CAGCAAACCTCCCGTACTCC          |
| <b>U36b4</b>        | AGATTCGGGATATGCTGTTGGC        | TCGGGTCCTAGACCAGTGTTCC        |
